# Supplementary material
Source: publisher figshare collection journal article supplement (https://springernature.figshare.com/articles/dataset/_/20736697)
Supplement: Supplementary file 1 [file 1]

## Sheet: SourceData1_PairedArchMeasureme
Subject	Trial	Substrate	Type	RAV
HXTE09	Static	Unloaded	Foot	44.619
HXTE09	RUN02	CF	Foot	30.005
HXTE09	RUN03	CF	Foot	27.16
HXTE09	RUN04	CF	Foot	27.553
HXTE09	RUN05	Firm	Foot	32.401
HXTE09	RUN06	Firm	Foot	30.142
HXTE09	RUN07	Firm	Foot	32.393
HXTE09	RUN08	Wet2.5	Foot	37.923
HXTE09	RUN09	Wet2.5	Foot	35.933
HXTE09	RUN10	Wet2.5	Foot
HXTE09	RUN11	Wet5	Foot	35.031
HXTE09	RUN12	Wet5	Foot	39.288
HXTE09	RUN13	Wet5	Foot	34.398
HXTE09	RUN05	Firm	Track	33.417
HXTE09	RUN06	Firm	Track	31.366
HXTE09	RUN07	Firm	Track	27.346
HXTE09	RUN08	Wet2.5	Track	49.023
HXTE09	RUN09	Wet2.5	Track	44.119
HXTE09	RUN10	Wet2.5	Track	43.456
HXTE09	RUN11	Wet5	Track
HXTE09	RUN12	Wet5	Track	50.196
HXTE09	RUN13	Wet5	Track	51.29
HXTE10	Static	Unloaded	Foot	40.887
HXTE10	RUN02	CF	Foot	21.841
HXTE10	RUN03	CF	Foot	19.372
HXTE10	RUN04	CF	Foot	22.862
HXTE10	RUN05	Firm	Foot	25.687
HXTE10	RUN06	Firm	Foot	28.196
HXTE10	RUN07	Firm	Foot	26.048
HXTE10	RUN08	Wet2.5	Foot	30.041
HXTE10	RUN09	Wet2.5	Foot	26.191
HXTE10	RUN10	Wet2.5	Foot	25.326
HXTE10	RUN11	Wet5	Foot	26.422
HXTE10	RUN13	Wet5	Foot	25.356
HXTE10	RUN14	Wet5	Foot	24.339
HXTE10	RUN05	Firm	Track	25.362
HXTE10	RUN06	Firm	Track	26.561
HXTE10	RUN07	Firm	Track	26.849
HXTE10	RUN08	Wet2.5	Track	45.649
HXTE10	RUN09	Wet2.5	Track	43.8
HXTE10	RUN10	Wet2.5	Track	46.062
HXTE10	RUN11	Wet5	Track	55.691
HXTE10	RUN13	Wet5	Track	49.226
HXTE10	RUN14	Wet5	Track	50.35
HXTE11	Static	Unloaded	Foot	42.523
HXTE11	RUN02	CF	Foot	26.106
HXTE11	RUN03	CF	Foot	29.185
HXTE11	RUN04	CF	Foot	25.818
HXTE11	RUN05	Firm	Foot	25.426
HXTE11	RUN07	Firm	Foot	25.853
HXTE11	RUN08	Firm	Foot	27.226
HXTE11	RUN09	Wet2.5	Foot	25.523
HXTE11	RUN10	Wet2.5	Foot	24.883
HXTE11	RUN11	Wet2.5	Foot	25.202
HXTE11	RUN12	Wet5	Foot	27.866
HXTE11	RUN14	Wet5	Foot	29.049
HXTE11	RUN15	Wet5	Foot	26.591
HXTE11	RUN05	Firm	Track	22.025
HXTE11	RUN07	Firm	Track	18.27
HXTE11	RUN08	Firm	Track	28.942
HXTE11	RUN09	Wet2.5	Track	39.562
HXTE11	RUN10	Wet2.5	Track	38.626
HXTE11	RUN11	Wet2.5	Track	42.243
HXTE11	RUN12	Wet5	Track	53.976
HXTE11	RUN14	Wet5	Track	51.794
HXTE11	RUN15	Wet5	Track	49.838
HXTE12	Static	Unloaded	Foot	41.083
HXTE12	RUN02	CF	Foot	24.193
HXTE12	RUN03	CF	Foot	22.946
HXTE12	RUN04	CF	Foot	22.054
HXTE12	RUN05	Firm	Foot	22.371
HXTE12	RUN06	Firm	Foot	26.186
HXTE12	RUN07	Firm	Foot	22.216
HXTE12	RUN08	Wet2.5	Foot
HXTE12	RUN09	Wet2.5	Foot	24.755
HXTE12	RUN10	Wet2.5	Foot	25.996
HXTE12	RUN12	Wet5	Foot	26.013
HXTE12	RUN13	Wet5	Foot	29.287
HXTE12	RUN14	Wet5	Foot	26.945
HXTE12	RUN05	Firm	Track	8.781
HXTE12	RUN06	Firm	Track	20.388
HXTE12	RUN07	Firm	Track	15.975
HXTE12	RUN08	Wet2.5	Track	44.123
HXTE12	RUN09	Wet2.5	Track	41.671
HXTE12	RUN10	Wet2.5	Track	42.375
HXTE12	RUN12	Wet5	Track	53.773
HXTE12	RUN13	Wet5	Track	55.817
HXTE12	RUN14	Wet5	Track	55.606

## Sheet: SourceData2_HumanExperimentalTr
Trackway	Track	Depth	Reldepth	Pitch	RAV	ID
HXTE09	RUN08	1.667	0.122	1.01	49.023	HumanExp1
HXTE09	RUN09	1.661	0.121	0.779	44.119	HumanExp1
HXTE09	RUN10	1.484	0.108	0.596	43.456	HumanExp1
HXTE09	RUN12	2.251	0.166	3.498	50.196	HumanExp1
HXTE09	RUN13	2.524	0.183	-0.519	51.29	HumanExp1
HXTE10	RUN08	1.18	0.086	1.518	45.649	HumanExp1
HXTE10	RUN09	0.929	0.067	0.154	43.8	HumanExp1
HXTE10	RUN10	1.208	0.087	1.544	46.062	HumanExp1
HXTE10	RUN11	2.827	0.208	-1.717	55.691	HumanExp1
HXTE10	RUN12	2.296	0.171	-1.713	50.894	HumanExp1
HXTE10	RUN13	2.027	0.151	-0.572	49.226	HumanExp1
HXTE10	RUN14	2.187	0.163	-0.642	50.35	HumanExp1
HXTE11	RUN09	1.29	0.093	-0.014	39.562	HumanExp1
HXTE11	RUN10	1.182	0.085	0.929	38.626	HumanExp1
HXTE11	RUN11	1.193	0.088	1.332	42.243	HumanExp1
HXTE11	RUN12	2.601	0.193	-4.798	53.976	HumanExp1
HXTE11	RUN13	2.572	0.19	-5.919	49.458	HumanExp1
HXTE11	RUN14	2.492	0.173	-2.121	51.794	HumanExp1
HXTE11	RUN15	2.232	0.16	-3.343	49.838	HumanExp1
HXTE12	RUN08	1.459	0.106	0.747	44.123	HumanExp1
HXTE12	RUN09	1.302	0.093	1.356	41.671	HumanExp1
HXTE12	RUN10	1.444	0.102	1.314	42.375	HumanExp1
HXTE12	RUN11	2.791	0.189	1.02	51.757	HumanExp1
HXTE12	RUN12	2.67	0.185	0.034	53.773	HumanExp1
HXTE12	RUN13	2.8	0.202	0.051	55.817	HumanExp1
HXTE12	RUN14	2.58	0.181	-0.133	55.606	HumanExp1
HXTE13	RUN08	2.119	0.152	2.653	42.741	HumanExp1
HXTE13	RUN09	1.454	0.104	1.882	45.141	HumanExp1
HXTE13	RUN10	1.236	0.09	1.736	41.39	HumanExp1
HXTE13	RUN12	2.255	0.161	1.563	48.561	HumanExp1
HXTE13	RUN13	1.896	0.137	0.837	48.84	HumanExp1
HXTE14	RUN08	1.575	0.12	-0.22	47.542	HumanExp1
HXTE14	RUN09	1.686	0.124	2.128	46.64	HumanExp1
HXTE14	RUN10	1.408	0.102	1.555	42.845	HumanExp1
HXTE14	RUN11	2.904	0.219	2.404	51.923	HumanExp1
HXTE14	RUN12	2.619	0.192	2.229	46.334	HumanExp1
HXTE14	RUN13	2.512	0.188	0.045	48.482	HumanExp1
HXTE14	RUN14	2.117	0.165	0.231	48.467	HumanExp1
HXTE15	RUN08	1.016	0.079	1.385	43.459	HumanExp1
HXTE15	RUN09	1.058	0.084	1.528	44.903	HumanExp1
HXTE15	RUN10	1.071	0.081	1.232	44.368	HumanExp1
HXTE15	RUN11	1.112	0.089	1.66	47.42	HumanExp1
HXTE15	RUN12	3.112	0.239	3.34	54.843	HumanExp1
HXTE15	RUN13	2.705	0.215	0.343	52.51	HumanExp1
HXTE15	RUN14	2.815	0.226	1.386	51.701	HumanExp1
HXTE16	RUN08	1.285	0.091	1.825	46.061	HumanExp1
HXTE16	RUN09	1.287	0.091	2.086	44.303	HumanExp1
HXTE16	RUN10	1.312	0.09	2.291	45.99	HumanExp1
HXTE16	RUN11	2.384	0.172	1.033	52.702	HumanExp1
HXTE16	RUN12	2.18	0.165	0.041	51.616	HumanExp1
HXTE16	RUN13	2.335	0.18	1.649	52.847	HumanExp1
HXTE16	RUN14	2.327	0.172	0.735	52.432	HumanExp1
HXTE16	RUN15	2.065	0.142	0.465	51.548	HumanExp1
BE	BE1	0.37	0.027	-0.63	33.521	HumanExp2
BE	BE2	0.207	0.015	1.608	26.411	HumanExp2
BE	BE3	0.162	0.011	-0.733	18.492	HumanExp2
BH	BH1	0.208	0.014	0.779	29.92	HumanExp2
BH	BH2	0.274	0.021	-0.312	27.741	HumanExp2
BH	BH3	0.491	0.032	-0.085	25.099	HumanExp2
BJ	BJ1	0.511	0.035	-0.023	33.55	HumanExp2
BJ	BJ2	0.547	0.036	0.2	31.05	HumanExp2
BJ	BJ3	0.536	0.036	1.699	38.477	HumanExp2
BM	BM1	0.565	0.038	1.492	33.415	HumanExp2
BM	BM2	0.341	0.026	1.974	38.524	HumanExp2
BM	BM3	0.485	0.033	2.637	40.297	HumanExp2
BN	BN1	0.36	0.026	1.089	32.141	HumanExp2
BN	BN2	0.327	0.023	1.314	32.775	HumanExp2
BN	BN3	0.548	0.04	-0.144	36.928	HumanExp2
BO	BO2	0.257	0.02	0.248	27.65	HumanExp2
BO	BO3	0.185	0.015	0.739	23.853	HumanExp2
BO	BO4	0.829	0.066	3.013	36.739	HumanExp2
BP	BP1	0.934	0.066	-0.966	42.425	HumanExp2
BP	BP2	0.909	0.067	1.429	36.652	HumanExp2
BP	BP3	0.848	0.061	-0.334	38.364	HumanExp2
BX	BX1	0.807	0.058	-0.26	38.735	HumanExp2
BX	BX2	1.027	0.076	-1.495	41.27	HumanExp2
BX	BX3	0.779	0.05	2.703	44.323	HumanExp2
DB	DB1	3.938	0.278	1.618	46.392	HumanExp2
DB	DB2	2.402	0.17	0.697	48.023	HumanExp2
DB	DB3	2.417	0.162	3.85	49.212	HumanExp2
DC	DC2	1.038	0.063	2.634	35.634	HumanExp2
DC	DC3	3.082	0.194	8.827	51.426	HumanExp2
DC	DC4	2.958	0.185	2.827	44.72	HumanExp2
DD	DD1	0.58	0.036	0.082	35.322	HumanExp2
DD	DD2	0.355	0.022	-0.549	21.832	HumanExp2
DD	DD3	1.289	0.076	0.894	41.412	HumanExp2
DE	DE2	4.376	0.35	1.695	49.872	HumanExp2
DE	DE3	4.489	0.335	0.074	51.653	HumanExp2
DF	DF13	2.629	0.17	5.06	53.162	HumanExp2
DF	DF15	3.673	0.234	9.086	52.214	HumanExp2
DG	DG1	2.918	0.213	1.644	47.037	HumanExp2
DG	DG2	3.441	0.223	2.243	48.033	HumanExp2
DG	DG3	3.6	0.228	3.172	49.442	HumanExp2
DH	DH1	2.787	0.199	1.964	51.246	HumanExp2
DH	DH2	1.772	0.116	6.582	46.918	HumanExp2
DH	DH3	2.11	0.152	3.537	50.789	HumanExp2
DI	DI1	3.136	0.231	4.345	49.768	HumanExp2
DI	DI2	3.128	0.246	7.515	44.93	HumanExp2
DI	DI3	2.055	0.155	-1.661	45.318	HumanExp2
DJ	DJ1	2.866	0.218	2.949	55.493	HumanExp2
DJ	DJ3	3.062	0.213	0.788	51.003	HumanExp2
DK	DK2	3.72	0.252	-4.26	49.675	HumanExp2
DK	DK4	2.815	0.208	3.415	50.334	HumanExp2
DK	DK5	2.728	0.181	3.692	58.834	HumanExp2
DL	DL2	3.317	0.188	-1.183	44.724	HumanExp2
DL	DL3	2.762	0.161	6.265	49.747	HumanExp2
DL	DL4	2.943	0.195	2.723	50.151	HumanExp2
DM	DM1	1.31	0.097	-0.657	45.557	HumanExp2
DM	DM2	2.272	0.17	0.657	47.775	HumanExp2
DM	DM3	2.283	0.157	-1.396	50.09	HumanExp2
DN	DN1	3.208	0.225	8.184	56.008	HumanExp2
DN	DN2	3.226	0.234	1.601	51.92	HumanExp2
DN	DN3	3.41	0.247	3.529	52.047	HumanExp2
DO	DO10	1.952	0.196	2.415	44.807	HumanExp2
DO	DO11	2.606	0.232	-0.098	46.918	HumanExp2
DO	DO12	3.621	0.336	3.524	57.437	HumanExp2
DP	DP1	3.254	0.205	-0.168	55.211	HumanExp2
DP	DP2	2.847	0.189	3.948	52.797	HumanExp2
DP	DP3	3.405	0.223	3.415	53.84	HumanExp2
DQ	DQ1	1.975	0.172	5.175	47.802	HumanExp2
DQ	DQ3	1.712	0.142	2.277	47.249	HumanExp2
DQ	DQ5	2.03	0.168	-0.129	45.197	HumanExp2

## Sheet: SourceData3_ChimpanzeeTrackArch
Trackway	Track	Depth	Reldepth	Pitch	RAV	ID
CCH	6	0.473224	0.0565009	-0.547692	25.0161	Chimp
CCH	10	0.647834	0.0684445	1.76333	19.6978	Chimp
CCH	13	1.20201	0.14573	4.22739	10.7923	Chimp
CCH	18	1.71315	0.197436	2.08669	19.3305	Chimp
CCH	20	1.054	0.113613	2.87	27.5724	Chimp
CCH	24	1.05215	0.111895	2.61332	19.7411	Chimp
CCH	27	1.41532	0.147068	4.25943	15.8645	Chimp
CCH	35	1.36443	0.130828	5.19615	24.5927	Chimp
CCH	41	1.3089	0.139419	6.11427	27.8451	Chimp
CCH	42	1.3495	0.137025	7.16719	30.849	Chimp
CCH	50	1.46151	0.145709	3.6884	30.3175	Chimp
CCH	56	1.54414	0.164111	3.63565	27.5314	Chimp
CCH	58	1.37985	0.14364	4.80126	28.7341	Chimp
CCH	59	1.23839	0.132827	7.20705	6.82543	Chimp
CCH	60	1.43641	0.134436	4.69423	15.7406	Chimp
CCH	65	1.39591	0.137073	3.78461	29.5574	Chimp
CCH	66	1.28757	0.134141	2.65142	23.7901	Chimp
CCH	67	1.6766	0.171574	1.93356	24.2489	Chimp
CCH	68	1.20717	0.121324	2.8985	33.4206	Chimp
CCH	69	1.42559	0.139637	4.25244	23.5242	Chimp
CCH	70	1.04335	0.107821	1.6466	16.6602	Chimp
CCH	71	1.56232	0.149406	5.72576	21.9749	Chimp
CCH	73	1.33561	0.12512	0.568528	34.1577	Chimp
CCH	74	1.04783	0.103686	3.07808	12.596	Chimp
CCL	41	1.49517	0.144771	1.25161	25.925	Chimp
CCL	48	2.16368	0.222126	1.62926	33.7695	Chimp
CCL	52	1.62706	0.174015	1.38991	35.1772	Chimp
CCL	58	1.61965	0.167704	2.6391	35.0489	Chimp
CCL	62	1.12405	0.112321	0.442551	37.9785	Chimp
CCL	66	1.41502	0.157354	3.00575	31.2412	Chimp
CCL	67	1.52594	0.166019	3.38948	33.9452	Chimp
CCL	68	1.83902	0.186244	3.9191	39.2218	Chimp
CCL	73	1.56483	0.154225	1.40261	42.9721	Chimp
CCL	74	1.37441	0.154532	1.53629	34.2164	Chimp
CCL	75	1.87279	0.191771	1.77005	36.2115	Chimp
CCL	76	1.69475	0.162239	0.33117	36.5404	Chimp
CCL	77	1.38309	0.139829	2.60573	35.3261	Chimp
CCL	79	1.89651	0.189341	1.49125	34.8582	Chimp
CCL	80	1.92625	0.19431	1.70389	31.2181	Chimp
CCL	82	1.55291	0.160188	3.68364	21.7746	Chimp
CCL	86	1.66089	0.177987	-0.805414	33.293	Chimp
CCL	87	1.49333	0.14131	0.813653	33.3298	Chimp
CCL	89	1.46015	0.143335	0.468159	36.5648	Chimp
CCL	92	1.37705	0.142615	3.14738	37.6455	Chimp
CCL	94	1.58623	0.14545	0.551225	31.4179	Chimp

## Sheet: SourceData4_FossilTrackArches
Trackway	Track	Depth	Reldepth	Pitch	RAV	ID
T1	H2	1.87	0.137	5.495	52.5209	Namibia
T1	H9	2.547	0.237	-3.643	48.1933	Namibia
T1	H17	1.303	0.11	2.55	40.8426	Namibia
T1	H19	0.612	0.047	-0.199	48.8269	Namibia
T1	H21	0.623	0.057	1.547	38.0635	Namibia
T1	H23	0.262	0.022	1.111	44.9597	Namibia
T1	H25	1.175	0.104	3.906	48.2114	Namibia
T1	H31	0.442	0.04	3.801	45.3353	Namibia
T1	H36	1.564	0.139	2.023	44.1761	Namibia
T1	H41	1.312	0.104	4.5	46.8093	Namibia
T1	H42	1.312	0.108	1.653	49.6734	Namibia
T1	H45	1.697	0.141	4.537	50.1346	Namibia
T1	H47	2.108	0.16	3.48	53.0783	Namibia
T1	H48	2.442	0.187	0.131	48.6567	Namibia
T1	H49	2.368	0.248	1.595	49.1677	Namibia
T1	H58	2.137	0.232	3.405	51.7618	Namibia
T1	H61	2.208	0.185	1.862	40.4588	Namibia
T1	H71	4.893	0.378	-0.337	50.7273	Namibia
T1	H77	4.968	0.371	-2.177	41.0654	Namibia
T2	Harriette18	1.369	0.116	5.749	49.3104	Namibia
T2	Harriette51	1.587	0.131	0.837	54.2043	Namibia
T2	HR20	1.129	0.088	3.075	44.3729	Namibia
T2	HR21	0.628	0.048	0.846	34.6223	Namibia
T2	HR29	1.045	0.086	1.182	45.7534	Namibia
T2	HR31	1.363	0.109	0.439	50.7104	Namibia
T2	HR44	1.788	0.141	3.839	51.7318	Namibia
T2	HR67	1.336	0.121	2.047	52.9825	Namibia
T2	HR86	0.452	0.036	1.72	34.2745	Namibia
T2	HR89	1.717	0.141	4.838	54.124	Namibia
T2	HR91	0.792	0.066	3.474	43.6633	Namibia
T2	HR116	2.162	0.178	2.405	52.3694	Namibia
T2	HR130	1.571	0.114	3.174	43.9894	Namibia
FU-O	FU-A	3.149	0.291	-3.452	56.5569	Ileret
FU-O	FU-L	3.925	0.293	-20.969	47.1516	Ileret
FUT1A	FUT1-6	4.031	0.305	-6.645	30.6766	Ileret
FUT1A	FUT1-7A	4.356	0.423	-4.575	50.8378	Ileret
FUT1A	FUT1-12	4.876	0.385	-7.05	34.4137	Ileret
FUT1A	FUT1-14	3.927	0.359	-3.994	41.3598	Ileret
FUT1A	FUT1-16	2.438	0.181	-5.495	52.7423	Ileret
FE3	H6	8.212	0.626	-1.108	50.3234	Ileret
FLT1	FLT1-1	2.985	0.245	-10.505	54.4423	Ileret
FLT1	FLT1-2	4.164	0.321	-8.658	47.3877	Ileret
FE1	H2	3	0.37	-15.497	60.557	Ileret
G1	25	2.141	0.238	4.493	41.3644	LaetoliG1
G1	26	2.378	0.26	3.349	42.7657	LaetoliG1
G1	27	1.981	0.206	5.663	26.4294	LaetoliG1
G1	31	1.955	0.207	8.158	45.7154	LaetoliG1
G1	33	2.263	0.227	4.642	42.4101	LaetoliG1
G1	34	2.209	0.251	10.133	38.1124	LaetoliG1
G1	35	2.468	0.268	7.684	40.1344	LaetoliG1
G1	36	1.778	0.195	7.67	39.6562	LaetoliG1
G1	37	2.177	0.228	6.351	44.6819	LaetoliG1
G1	38	2.5	0.294	9.723	34.2484	LaetoliG1
G1	39	1.693	0.173	3.275	35.1913	LaetoliG1
S	S1-2	2.486	0.212	7.88	38.1852	LaetoliS1
S	S1-4	2.785	0.241	5.815	34.6774	LaetoliS1
A	A3	1.691	0.237	2.137	11.8289	LaetoliA

## Sheet: SourceData5_TrackRAVNavicularHe
Subject	Track	trackRAV	Depth	navHeight	footLength	relNavHeight
BE	BE1	33.521	0.37	48	23.5	2.04
BE	BE2	26.411	0.207	48	23.5	2.04
BE	BE3	18.492	0.162	48	23.5	2.04
BH	BH1	29.92	0.208	43.9	24.5	1.79
BH	BH2	27.741	0.274	43.9	24.5	1.79
BH	BH3	25.099	0.491	43.9	24.5	1.79
BJ	BJ1	33.55	0.511	38.3	22.5	1.7
BJ	BJ2	31.05	0.547	38.3	22.5	1.7
BJ	BJ3	38.477	0.536	38.3	22.5	1.7
BM	BM1	33.415	0.565	34.3	25	1.37
BM	BM2	38.524	0.341	34.3	25	1.37
BM	BM3	40.297	0.485	34.3	25	1.37
BN	BN1	32.141	0.36	46.4	24	1.93
BN	BN2	32.775	0.327	46.4	24	1.93
BN	BN3	36.928	0.548	46.4	24	1.93
BO	BO2	27.65	0.257	23.2	20.5	1.13
BO	BO3	23.853	0.185	23.2	20.5	1.13
BO	BO4	36.739	0.829	23.2	20.5	1.13
BP	BP1	42.425	0.934	38.2	23.5	1.63
BP	BP2	36.652	0.909	38.2	23.5	1.63
BP	BP3	38.364	0.848	38.2	23.5	1.63
BX	BX1	38.735	0.807	39.8	27.5	1.45
BX	BX2	41.27	1.027	39.8	27.5	1.45
BX	BX3	44.323	0.779	39.8	27.5	1.45
DH	DH1	51.246	2.787	36.6	25.5	1.44
DH	DH2	46.918	1.772	36.6	25.5	1.44
DH	DH3	50.789	2.11	36.6	25.5	1.44
DI	DI1	49.768	3.136	28.3	23	1.23
DI	DI2	44.93	3.128	28.3	23	1.23
DI	DI3	45.318	2.055	28.3	23	1.23
DJ	DJ1	55.493	2.866	38.4	24	1.6
DJ	DJ3	51.003	3.062	38.4	24	1.6
DK	DK2	49.675	3.72	28.7	25.5	1.13
DK	DK4	50.334	2.815	28.7	25.5	1.13
DK	DK5	58.834	2.728	28.7	25.5	1.13
DL	DL2	44.724	3.317	38.3	28.5	1.34
DL	DL3	49.747	2.762	38.3	28.5	1.34
DL	DL4	50.151	2.943	38.3	28.5	1.34
DM	DM1	45.557	1.31	35.1	25	1.4
DM	DM2	47.775	2.272	35.1	25	1.4
DM	DM3	50.09	2.283	35.1	25	1.4
DN	DN1	56.008	3.208	29	24.5	1.18
DN	DN2	51.92	3.226	29	24.5	1.18
DN	DN3	52.047	3.41	29	24.5	1.18
DO	DO10	44.807	1.952	21.4	20	1.07
DO	DO11	46.918	2.606	21.4	20	1.07
DO	DO12	57.437	3.621	21.4	20	1.07
DP	DP1	55.211	3.254	27.4	26	1.05
DP	DP2	52.797	2.847	27.4	26	1.05
DP	DP3	53.84	3.405	27.4	26	1.05
DQ	DQ1	47.802	1.975	29.8	20.5	1.45
DQ	DQ3	47.249	1.712	29.8	20.5	1.45
DQ	DQ5	45.197	2.03	29.8	20.5	1.45
